# Supplementary material for: Translation of Human β-Actin mRNA is Regulated by mTOR Pathway
Source: PubMed Central journal article supplement (PMC6410274; doi:10.3390/genes10020096), 2019-01-29
Supplement: genes-10-00096-s001.pdf [file genes-10-00096-s001.pdf]

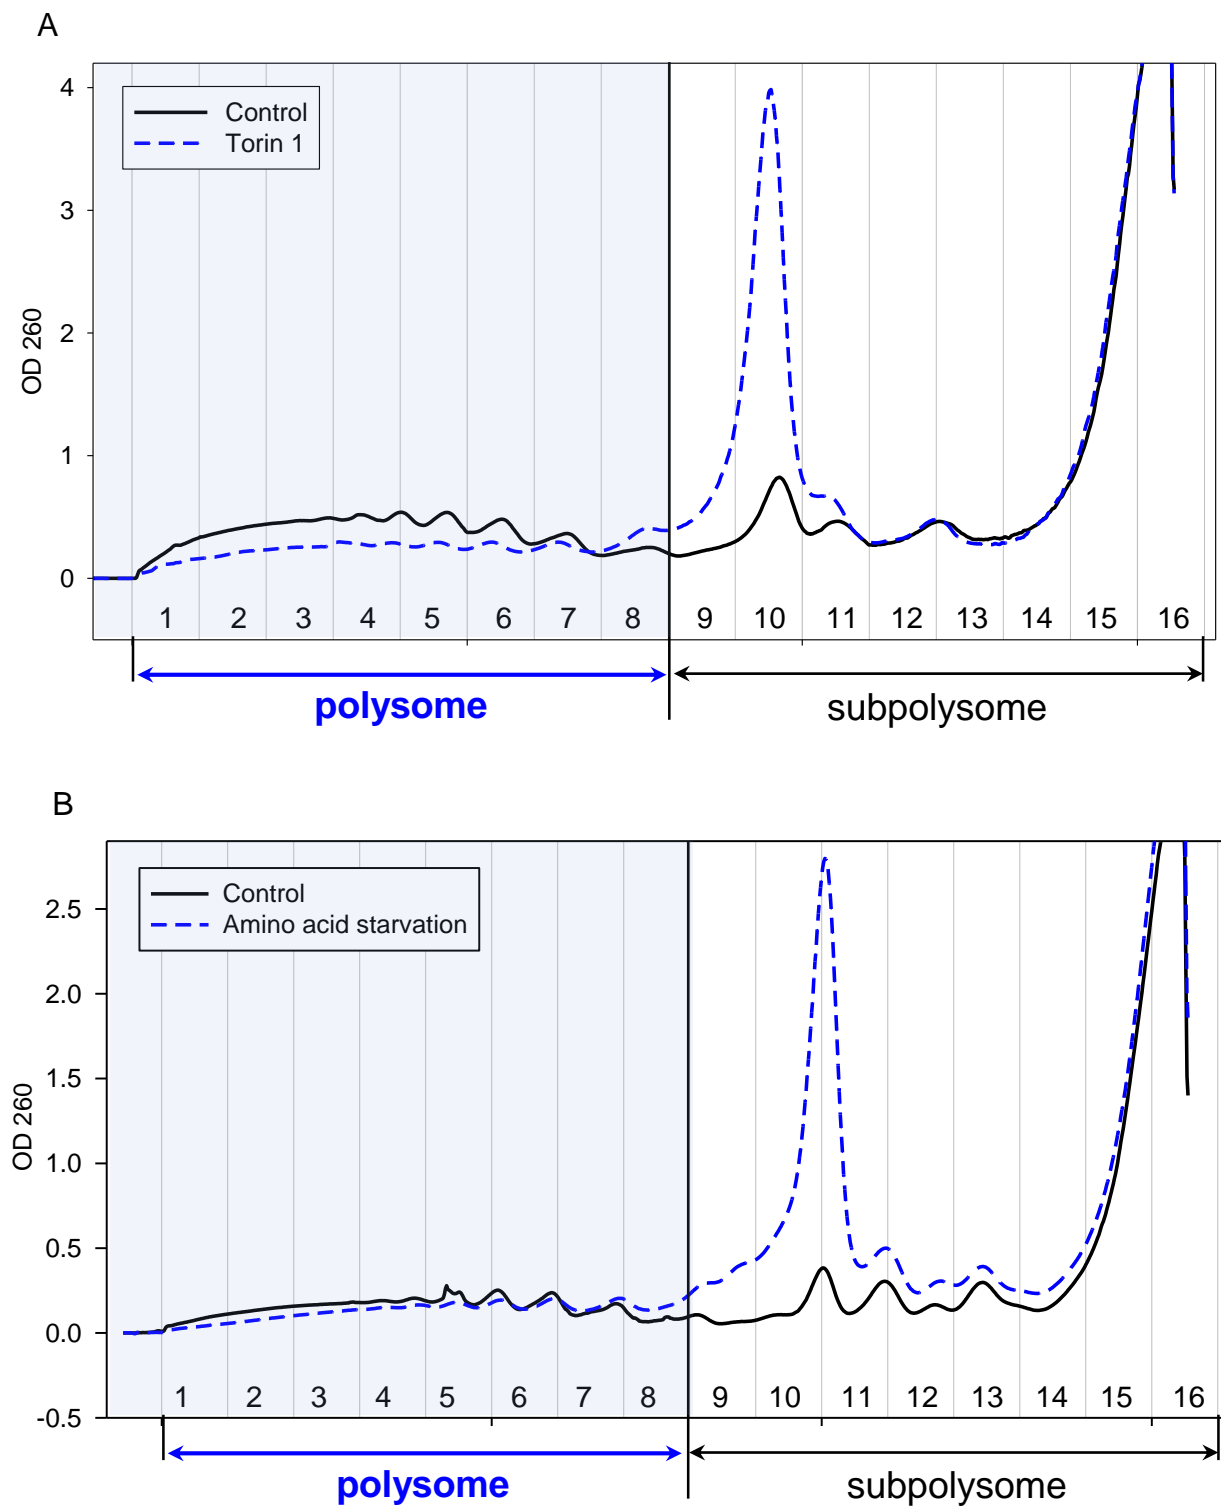

**Supplementary Figure 1.** Polysome profiles of HEK293T cells: untreated (control) and 2h treated with 500 nM Torin 1 (A) or 2h amino acid and serum starved (B). The cells were lysed and analyzed by sucrose gradient centrifugation. Typical profiles of optical density at A260 are shown. United polysome- (1-8) and subpolysome (9-16) fractions are marked.

| Primers for cloning                 |                                                                 |
|-------------------------------------|-----------------------------------------------------------------|
| For_pNL2.2_1-20                     | ATGGTCTTCACACTCGAAGA                                            |
| Rev_pNL2.2_4801-4820                | AACAGTACCGGATTGCCAAG                                            |
| For_ACTB_prom                       | <b>CTTGGAATCCGGTACTGTT</b> CGCTCAGTGCCCAAGAGATGTC               |
| Rev_ACTB_5UTR                       | <b>TCTTCGAGTGTGAAGACCAT</b> GGTGAGCTGGCGGCGGGTGTGGAC            |
| For_RPL32_prom                      | <b>CTTGGAATCCGGTACTGTT</b> AGAAGCGTGGAGTTTGGAG                  |
| Rev_RPL32_5UTR                      | <b>TCTTCGAGTGTGAAGACCAT</b> GATGCCGAGAAGGAGATGGCTGCCAC          |
| For_SLU7_prom                       | <b>CTTGGAATCCGGTACTGTT</b> CACAGCCTGGCTACTAATTAGTGCCAAGTTTAACTG |
| Rev_SLU7_5UTR                       | <b>TCTTCGAGTGTGAAGACCAT</b> GGTTATCTGGCCTCCTCCAGCCCCGCCGACGTA   |
| For_YB-1_prom                       | <b>CTTGGAATCCGGTACTGTT</b> TCGAGCCCCCTTCCAATCC                  |
| Rev_YB-1_5UTR                       | <b>TCTTCGAGTGTGAAGACCAT</b> GGTTGCGGTGATGGTG                    |
| Primers for qPCR                    |                                                                 |
| For_fLuc                            | GGATTACCAGGGATTTCAATCGATG                                       |
| Rev_fLuc                            | GTTTTGTCACGATCAAAGGACTCTGGTAC                                   |
| For_NLuc                            | GCTGTTCCGAGTAACCATCAAC                                          |
| Rev_NLuc                            | GGTCCATACCGCTTTCTTGTG                                           |
| For_ACTB                            | ACACCCTTTCTTGACAAAACCT                                          |
| Rev_ACTB                            | CGCATCTCATATTTGGAATGACT                                         |
| For_RPL14                           | AGCTCACTGATTTATCCTCAAG                                          |
| Rev_RPL14                           | TGTCATCTTGGCTTTCTTTCTC                                          |
| For_RPL32                           | TGCAACAAATCTTACTGTGCCGA                                         |
| Rev_RPL32                           | TGGCATTGGGGTTGGTGACT                                            |
| For_SLU7                            | TGATTTGGCAAACGAACATTG                                           |
| Rev_SLU7                            | TCCATCTGAGAATTTGGTTCCT                                          |
| For_YB-1                            | AGGCGAAGGTTCCACCTTA                                             |
| Rev_YB-1                            | GTTGTCAGCACCTCCATCA                                             |
| Primers for cDNA synthesis (5'RACE) |                                                                 |
| PlugOligo adapter                   | AAGCAGTGGTATCAACGCAGAGTACGGGGG                                  |
| oligo-dT18                          | TTTTTTTTTTTTTTTTTT                                              |
| Primers for 1st PCR round (5'RACE)  |                                                                 |
| For_RACE_PlugOligo                  | <b>ACACTCTTCCCTACACGACGCTCTTCCGATCT</b> AAGCAGTGGTATCAACGCAGAGT |
| Rev_RACE_NLucP                      | <b>GTGACTGGAGTTCAGACGTGTGCTCTTCCGATCT</b> GGTCCATACCGCTTTCTTGTG |

**Supplementary Table S1.** Primers for promoter cloning, qPCR and 5' RACE are shown. Sequences complementary to pNL2.2 and used for SLIC cloning are highlighted in red. Illumina adaptor sequences highlighted in blue.
